# Supplementary figures and images for: Developing Behaviour Change Interventions for Improving Access to Health and Hygiene for People with Disabilities: Two Case Studies from Nepal and Malawi
Source: MDPI journal article supplement (doi:10.3390/ijerph15122746), 2018-12-05

# Theory of change for the menstrual hygiene behaviour change campaign

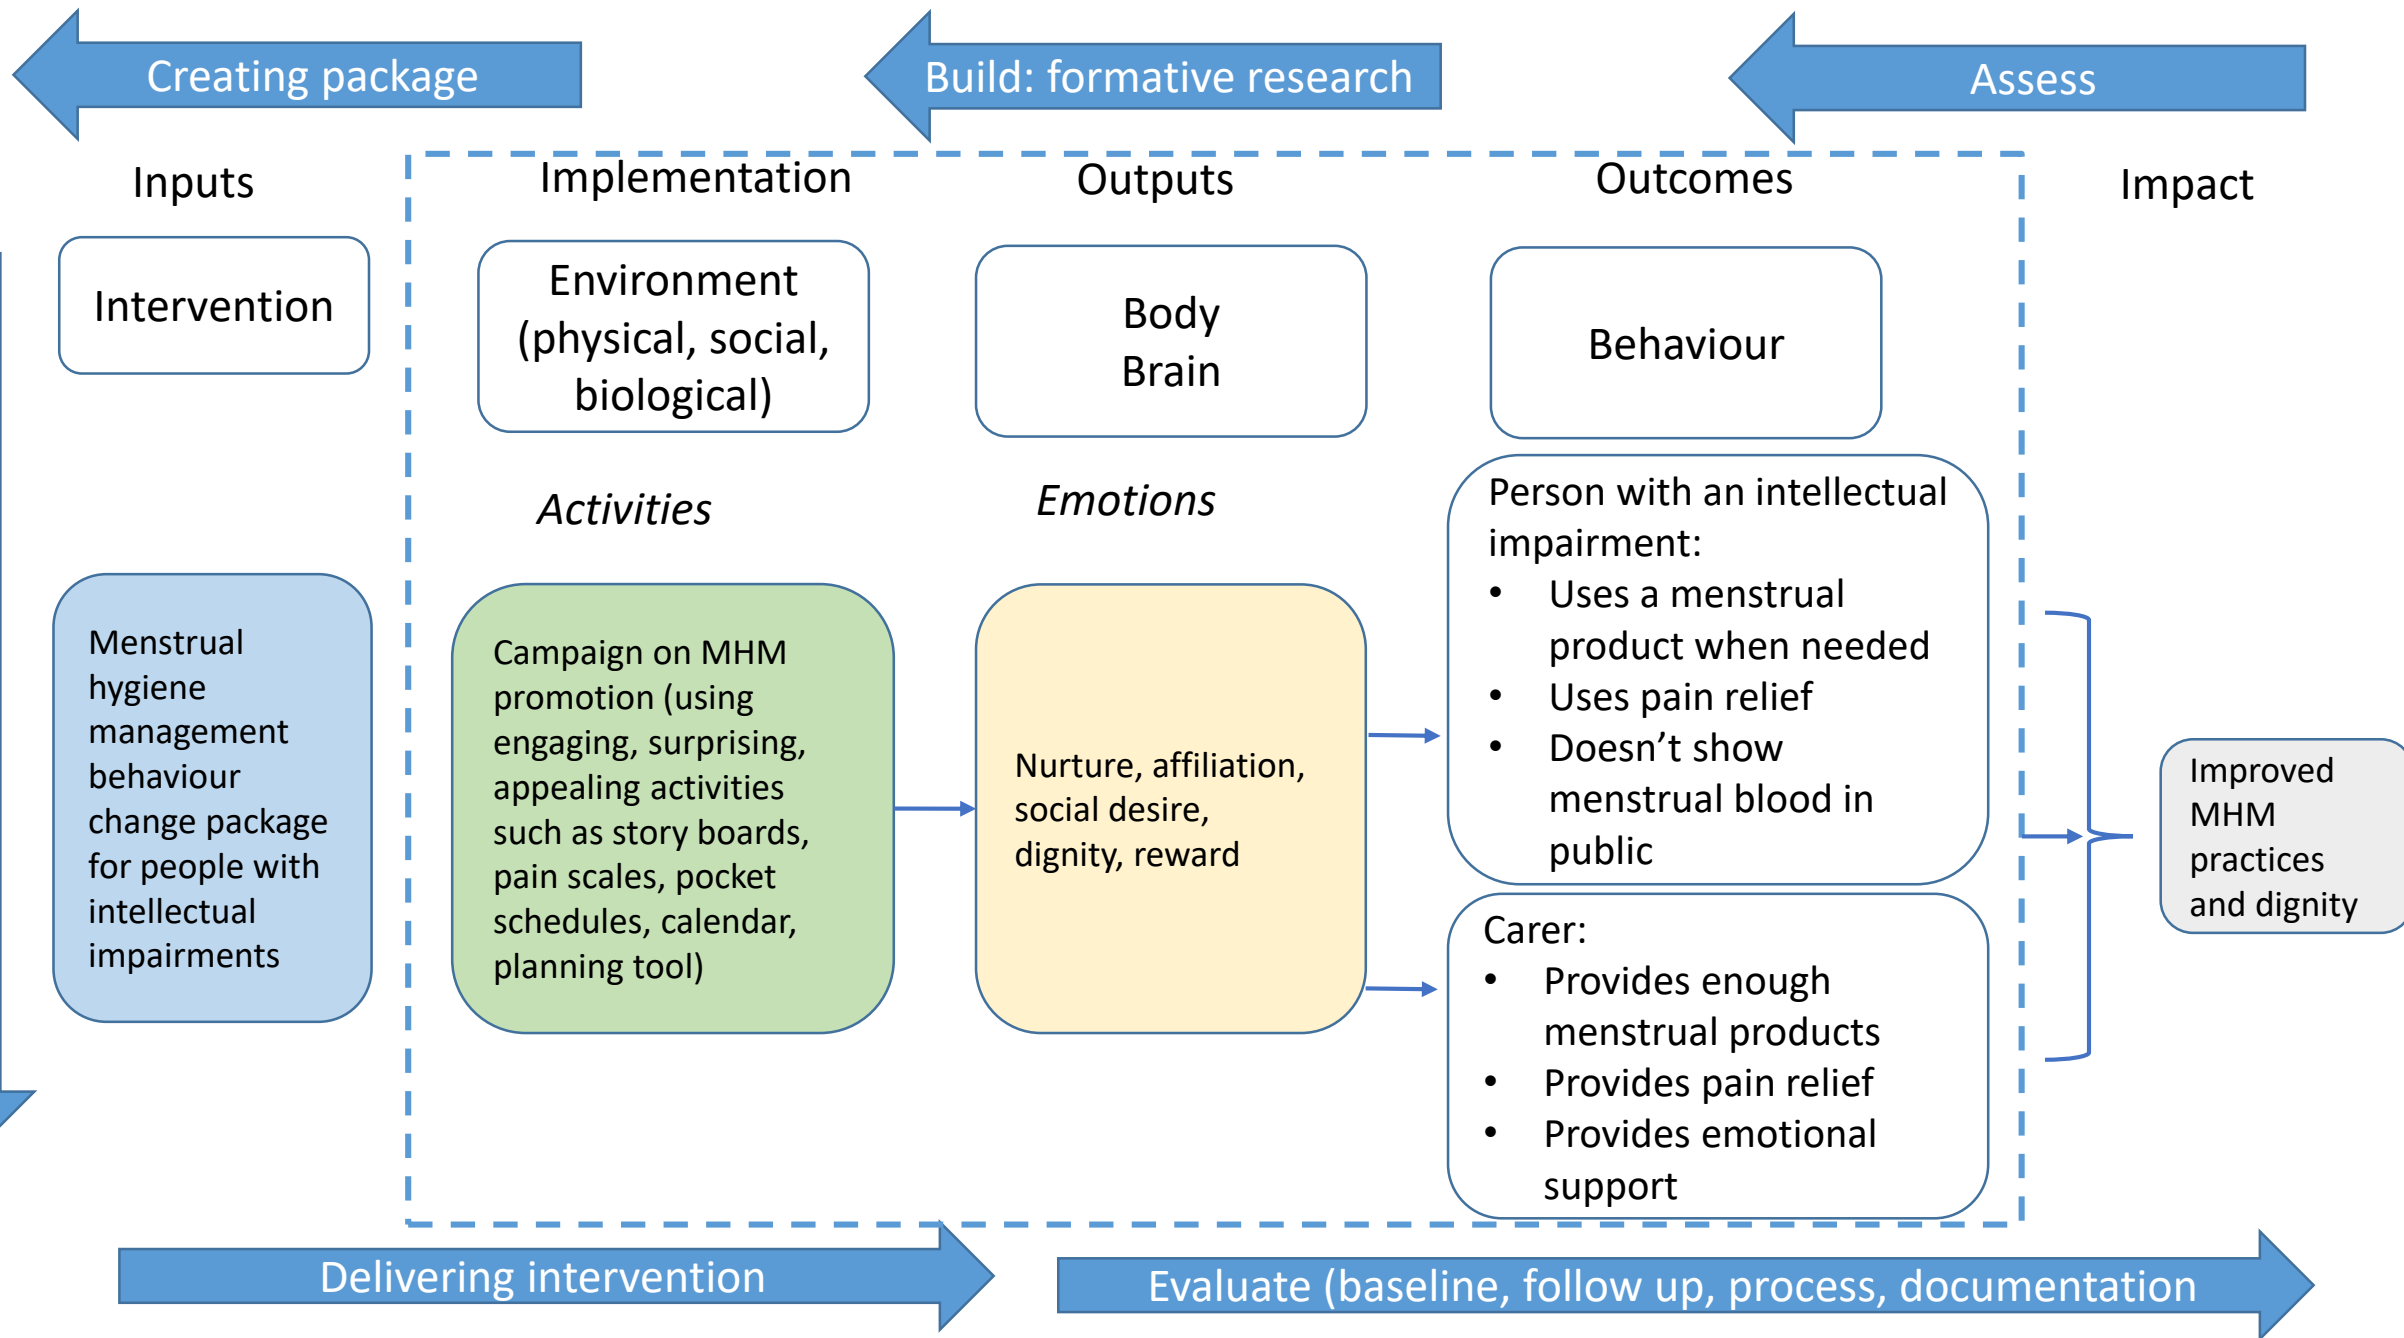

Supplement: s1 [file s1]
